# Prediction of motor outcome after acute stroke using rich-club organizational analysis

Lu Wang<sup>1</sup>, Kui Kai Lau<sup>3</sup>, Leonard SW Li<sup>3</sup>, Yuen Kwun Wong<sup>3</sup>, Christina Yau<sup>4</sup>, Henry KF Mak<sup>1,2</sup>, Edward S Hui<sup>1,2,\*</sup>

<sup>1</sup> Department of Diagnostic Radiology, University of Hong Kong, Pokfulam, HKSAR

<sup>2</sup> State Key Laboratory of Brain and Cognitive Sciences, University of Hong Kong, Pokfulam, HKSAR

<sup>3</sup> Department of Medicine, University of Hong Kong, Pokfulam, HKSAR

<sup>4</sup> Department of Occupational Therapy, Tung Wah Hospital, HKSAR

\* Corresponding author

## Abstract

Stroke is one of the major diseases that causes disability, such as motor impairment. As a complex network of integrated regions, brain plasticity underlies functional recovery. Study showed that rich-club, highly connected and central brain regions, may underpin brain function and be associated with many brain disorders. In this study, we aim to explore rich-club organizational changes in the process of stroke recovery, and also the biomarkers that may help predict motor outcome. A cohort of 16 first-time acute ischemic stroke patients (11 males; mean age  $65.8 \pm 11.0$ ) were recruited. Structural brain networks were measured using T1-weighted imaging and diffusion tensor imaging within 1 week, and 1, 3 and 6 months after stroke. Motor functions were also assessed using Extremity Fugl-Meyer Motor (UE-FM) and Barthel Index (BI) at the same time points. Changes in rich club organization and brain network topology, and their relations with motor outcome were investigated using Bayesian linear mixed model. The predictors of motor outcome were also investigated. Rich club regions and normalized rich club coefficient changed during the course of stroke recovery. Apart from clustering coefficient, the degree, strength, efficiency and betweenness centrality of each rich club region did not change with time after stroke. Temporal change in topological and rich-club metrics, including the mean degree, degree and mean strength of periphery regions, density of local connections, density ratio of feeder and local connections, communication cost ratio of rich club and capacity of rich club, were observed. The communication cost ratio and capacity of local connections were found to correlate with UE-FM and BI. The communication cost of rich connections and normalized rich club coefficient were found to be the predictors for UE-FM, whilst the density of local connections, normalized rich club coefficient, cost ratio and communication cost ratio of feeder connections were found to be the predictors for BI. Our

35 findings highlight the role of rich club organizational changes in the process of stroke recovery,  
36 and that network measures of rich club organization may potentially be the prognostic indicator  
37 of motor recovery after acute ischemic stroke.

## 38 **Introduction**

39 Around 80% of patients suffer from motor impairment after stroke.<sup>1,2</sup> Brain plasticity  
40 mechanisms, including activity-dependent rewiring and synapse strengthening, may likely  
41 underlie the recovery of brain functions.<sup>3-6</sup> Previous studies have investigated the relation  
42 between motor recovery after stroke and the structural connectivity of local pathways, such as  
43 corticospinal<sup>7-10</sup>, alternate corticofugal<sup>11,12</sup>, and corticocortical pathways<sup>13-15</sup>. The relation  
44 between motor recovery and structural connectivity of stroke patients have also been  
45 investigated by large-scale analysis of structural connectivity<sup>18</sup>.

46 The neuroarchitecture of all types of brain regions can not only be understood at the local and  
47 global levels, as is usually performed, but also specific groups of brain regions and the  
48 relationship amongst them, known as rich-club organization<sup>19,20</sup>. Rich-club organization  
49 consists of brain regions that are closely connected, a.k.a. high centrality, which can dominant  
50 the entire brain network.<sup>19</sup> Rich club organization has been found in the brain of new-born,  
51 children and adult.<sup>21-23</sup> The bilateral frontoparietal regions and subcortical regions, including  
52 precuneus, superior frontal, parietal cortex, putamen, hippocampus and thalamus, formed rich  
53 club organization of healthy adults.<sup>23</sup> Rich club organization has been found to serve brain  
54 functions and regarded as the core of communication of the whole human brain<sup>24,25</sup>. The rich  
55 club organization of patients with schizophrenia<sup>26</sup>, Huntington's disease<sup>27</sup> and Alzheimer's  
56 disease<sup>28</sup> was impaired.

57 Two prior studies have investigated the relation between motor outcome of stroke patients  
58 versus rich club metrics, such as the number of rich-club nodes affected by stroke<sup>29</sup> and another  
59 the number of rich-club nodes and path length<sup>30</sup>. Considering that there is a lack of the  
60 understanding of the longitudinal changes in the rich-club organization after stroke, and the  
61 relation between motor outcome and the thereof, we therefore aimed to investigate whether  
62 rich club organization would change over the course of first acute ischemic stroke recovery,  
63 and also to investigate the biomarkers that may predict motor recovery.

## 64 **Materials and methods**

### 65 **Subjects and motor assessment**

66 Stroke patients (n = 16; 11 male; mean age  $65.8 \pm 11.0$ ; infarct side: 50% left) with first-time  
67 acute ischemic stroke were recruited between September 2015 and July 2018 with informed  
68 consent. MRI and assessment of motor functions were performed for at less than 1 week (n =  
69 12), and 1 (n = 16), 3 (n = 13) and 6 (n = 9) months after acute stroke. Motor functions were  
70 examined by the Upper-Extremity Fugl-Meyer assessment (UE-FM) scale and Barthel index  
71 (BI). The UE-FM was developed to quantitatively assess the severity of motor impairment of  
72 upper extremity due to hemiplegic stroke, and is based on the well-defined stages of motor  
73 recovery<sup>31</sup>. BI was developed to quantitatively assess disability and functional outcome<sup>32</sup>. All  
74 patients received rehabilitation at the Acute Stroke Unit of Queen Mary Hospital after  
75 admission due to acute stroke. After an average of 5 days after admission, patients were  
76 transferred to the Stroke Rehabilitation Ward of Tung Wah Hospital for more intensive  
77 rehabilitation. All patient underwent conventional occupational rehabilitation therapy sessions,  
78 including activity of daily living training, upper limb functional training, cognitive perceptual  
79 training and functional task training. All procedures were carried out following operational  
80 guidelines of Human Research Ethics Committee, and all protocols were approved by the  
81 Institutional Review Board of the University of Hong Kong/Hospital Authority Hong Kong  
82 West Cluster.

### 83 **Image acquisition**

84 All MRI scans were performed using a 3.0 T MRI scanner (Achieva TX, Philips Healthcare,  
85 Best, The Netherlands) with body coil for excitation and 8-channel head coil for reception.  
86 Diffusion tensor imaging (DTI) data was performed using single-shot spin-echo echo planar  
87 imaging, consisting of non-diffusion-weighted image (b0) and diffusion-weighted images  
88 (DWIs) with b-values =  $1000 \text{ s/mm}^2$  along 32 gradient directions, were acquired with the  
89 following parameters: TR/TE = 4000/81 ms, field of view =  $230 \times 230 \text{ mm}^2$ , reconstructed  
90 resolution =  $3 \times 3 \text{ mm}^2$ , 33 contiguous slices with thickness of 3 mm, SENSE factor = 2,  
91 number of averaging = 2, total scan time  $\approx 5$  minutes. TI-weighted images data were obtained  
92 by a 3D Magnetization Prepared-Rapid Gradient Echo (MPRAGE) with the following  
93 parameters: TR/TE/TI = 7/3.17/800 ms, field of view =  $240 \times 240 \text{ mm}^2$ , reconstruction  
94 resolution =  $1 \times 1 \times 1 \text{ mm}^3$ , 160 contiguous slices, scan time = 6 min 1 s.

### 95 **Image pre-processing**

96 All of the pre-processing procedures were performed by SPM12  
97 (<https://www.fil.ion.ucl.ac.uk/spm/>). Head motion correction was performed by registering  
98 DWI to b0 images<sup>33</sup>. MPRAGE images were first reoriented taking anterior commissure<sup>34</sup> as  
99 the origin. The reoriented MPRAGE images were normalized to MNI152 template to obtain a  
100 transformation matrix  $M$ . MNI152 template was then inverse normalized to MPRAGE images  
101 by the inverse of the transformation matrix  $M^{-1}$ . The inverse normalized MNI152 template  
102 was non-linearly registered to diffusion-weighted imaging and a transformation matrix  $T$  was  
103 obtained. In this way, an inverse warping transformation from the standard space to the native  
104 DTI space can be obtained.

## 105 **Network construction**

106 Tractography: Diffusion tensor and diffusion metrics were obtained using the Diffusion  
107 Toolkit<sup>32</sup>. White matter tractography was obtained using the TrackVis (<http://trackvis.org>) with  
108 the algorithm of Fibre Assignment by Continuous Tracking (FACT)<sup>36,37</sup> with angle threshold  
109 of 45° and random seed of 32. To smooth the corners of the fibres, spline filter was applied.  
110 The results of streamlines were used to construct the structural brain network.

111 Network nodes definition: Automated Anatomical Labelling 2 (AAL2) atlas<sup>38</sup> in the standard  
112 space was inversely wrapped to the individual DTI native space according to  $M^{-1}$  and  $T$   
113 obtained in image pre-processing. 94 Cortical regions (47 for each hemisphere) were obtained  
114 and each region was regarded as a node, of these 8 regions were excluded, namely left and  
115 right inferior occipital gyrus, left and right superior temporal pole, left and right middle  
116 temporal pole and left and right inferior temporal pole, due to variations in brain coverage.

117 Network link definition: UCLA Multimodal Connectivity package was used to calculate the  
118 number and the length of fibres between every two regions. Two regions were defined as  
119 connected regions if a fibre occurs between them. The link weight was defined as the fibre  
120 count between two regions.

## 121 **Network topology metrics**

122 MATLAB (2018b) and brain Connectivity Toolbox (<https://sites.google.com/site/bctnet/>) was  
123 used to calculate brain network topology metrics. The metrics included: (1) node degree,  
124 defined as the number of connected links of a node; (2) node strength, defined as the sum of  
125 the weight of connected links of a node; (3) local clustering coefficient, represented as  
126 connection property to neighbourhood of a node; (4) global efficiency, defined as the average  
127 inverse shortest path length in the network; (5) local efficiency, defined as the global efficiency

128 computed on node neighbourhoods; (6) node betweenness centrality, defined as the fraction  
129 of all shortest paths in the network that contain a given node.

### 130 **Rich club organization**

131 R language (3.6.0) was used to estimate rich club organization for each subject at each time  
132 point using a previously published method<sup>16</sup>. Weighted rich club coefficient was calculated by  
133 4 steps. First, for each degree ( $k$ ), a subnetwork was obtained by extracting nodes with degree  
134 more than  $k$  and links amongst them. Second, for each subnetwork, the number of links ( $n$ ) and  
135 sum of weights of the links ( $W$ ) was calculated. Then, the top  $n$  strongest weights of the whole  
136 network were summed. The weighted rich club coefficient of this subnetwork is subsequently  
137 calculated as follows:<sup>39</sup>

$$138 \quad \varphi^w(k) = \frac{W_{>k}}{\sum_{l=1}^n w_l^{\text{ranked}}}$$

139 where  $W_{>k}$  represents weights of the links more than  $k$  and  $\sum_{l=1}^n w_l^{\text{ranked}}$  sum of top  $n$  weights  
140 of links. However, nodes with lower degree in a network have lower possibilities of sharing  
141 links with each other by coincidence, even random networks generate increasing rich club  
142 coefficients as a function of increasing degree threshold  $k$ . To circumvent with this effect,  
143 1,000 random networks with the same size and same degree distribution of the network of  
144 interest were generated. The average of the rich-club coefficients of the 1,000 random networks  
145 were calculated. The normalized rich-club coefficient of the network of interest is defined  
146 as<sup>19,20</sup>

$$147 \quad \varphi_{\text{norm}} = \frac{\varphi_k}{\varphi_{\text{random}}}$$

148 A subnetwork is considered as a rich club organization when  $\varphi_{\text{norm}}(k) > 1$ <sup>40,41</sup>.

149 A node is considered as a rich club node when  $k = \{k_1, k_2, \dots, k_n\}$ , in which the highest  $k$  was  
150 called highest rich club level. Each node of a rich club organization was given a score according  
151 to their highest rich club level. And then after averaging the score of nodes from all participates  
152 at the same time point, the top 8 nodes(i.e., 10% of all nodes) were selected as rich club nodes  
153 so that number of nodes used to construct the rich club organization avoid different average  
154 degree across subjects.

### 155 **Node and Connection types**

156 There are two types of nodes in a rich club organization, namely rich club nodes and peripheral  
157 nodes. On the other hand, there are three types of connections in a rich club organization,  
158 namely rich club connections (between rich club nodes), feeder connections (between rich club  
159 nodes and non-rich club nodes), and local connections (between non-rich club nodes).<sup>42</sup>

## 160 **Network communication**

161 Cost of a link was defined by product of its length and density (the count of streamlines between  
162 two brain regions). Communication cost was defined by the product of length and density based  
163 on their topological distance<sup>42</sup>. To calculate communication cost of three connections, first, the  
164 shortest paths between 84 nodes should be calculated. Then, each link of the shortest paths was  
165 divided into three categories (rich club, feeder and local connections). Next, calculate the  
166 communication cost of each link by length and density. Last, communication cost of three kind  
167 of connections can be obtained by summing the communication cost of links in each kind. The  
168 metric ratio of a certain connection kind was defined as the sum of metric of this certain kind  
169 divided by the total metric of the whole network. Communication cost/density ratio was  
170 defined as the communication cost ratio divided by density ratio, which was the weight of  
171 capacity<sup>42</sup>.

## 172 **Statistical analysis**

173 Statistical analyses were performed by R Language (version 3.6.0) with the function lmer  
174 (<https://cran.r-project.org/web/packages/lme4/lme4.pdf>) and blmer (<https://cran.rproject.org/web/packages/blme/blme.pdf>). To simplify the statistical analyses on the local structural brain  
176 networks, the left and right hemispheres were flipped so that the left hemisphere always  
177 corresponded to the ipsilesional hemisphere. Due to attrition, some of the behavioural data, as  
178 well as imaging data, were not obtained. Imputation was thus performed on the behavioural  
179 data to increase the effective sample size for subsequent statistical analyses. For patient no. 2,  
180 13 and 15, the behavioural data at 6 months after stroke were imputed from those at 3 months.  
181 Since patient no. 11 and 16 already made full recovery at the last follow up, full behavioural  
182 scores were assumed for the missing time points. After imputation, 10 patients had the  
183 behavioural data for all 4 time points. The imputed behavioural data were underlined in Table  
184 1.

185 To handle data with an unequal number of longitudinal measures, a Bayesian linear mixed  
186 model (LMM)<sup>43,44</sup> was used as the main model in the current study so that a posteriori  
187 estimation can be maximized in a Bayesian setting. When necessary, linear mixed models were

188 followed by post hoc tests with Bonferroni corrections for multiple comparisons at  $p < 0.05$ .  
 189 This study mainly investigated three aspects: (1) To test whether the motor outcome and  
 190 network metrics changed with time. In this part, models are established with the motor outcome  
 191 and network metrics as responses, time as fixed variable, each subject as random variable, and  
 192 age and gender as covariates. (2) To test the correlation of metrics with motor outcome. In this  
 193 part, models were established with motor assessment data as responses, network metric to be  
 194 tested as fixed variable, each subject as random variable, and age and gender as covariates. (3)  
 195 To find the biomarkers that may predict motor recovery. Models were established with the  
 196 change of motor outcome (subtract the baseline motor outcome from motor outcome at other  
 197 time points) as response, each subject as random variable, metric to be tested as fixed variable,  
 198 and time, age and gender as covariates. After selecting the metrics that may be predictors of  
 199 response. A linear mixed regression model was established by the method of step wise. In the  
 200 whole study, a best fitting model was chosen by comparing models using Likelihood ratio test  
 201 with the principle of the smaller AIC, the better the model<sup>45</sup>. Also, the simplest model was  
 202 chosen when the gap of AIC values and likelihood ratio test result were small.

203 **Table 1.** The baseline demographics and assessment of motor impairment (upper-extremity  
 204 Fugl-Meyer motor scale) and performance of activity of daily living (Barthel Index) of  $n = 16$   
 205 patients.

| Patient | Upper-Extremity Fugl-Meyer Motor Scale (0 – 66) |         |           |           | Barthel Index (0 – 100) |         |            |            |
|---------|-------------------------------------------------|---------|-----------|-----------|-------------------------|---------|------------|------------|
|         | < 1 week                                        | 1 month | 3 months  | 6 months  | < 1 week                | 1 month | 3 months   | 6 months   |
| 1       | 33                                              | 64      | 66        | 66        | 55                      | 90      | 100        | 100        |
| 2       | N.A.                                            | 63      | 63        | <u>63</u> | N.A.                    | 95      | 100        | <u>100</u> |
| 3       | N.A.                                            | 5       | 14        | 18        | N.A.                    | 65      | 85         | 100        |
| 4       | 0                                               | 2       | N.A.      | N.A.      | 0                       | 40      | N.A.       | N.A.       |
| 5       | N.A.                                            | 31      | 40        | 49        | N.A.                    | 65      | 80         | 85         |
| 6       | N.A.                                            | 48      | 62        | 63        | N.A.                    | 25      | 75         | 95         |
| 7       | 0                                               | 7       | 13        | 20        | 35                      | 40      | 45         | 70         |
| 8       | 0                                               | 5       | 5         | 5         | 30                      | 50      | 50         | 50         |
| 9       | 56                                              | 64      | 66        | 66        | 55                      | 60      | 100        | 100        |
| 10      | 54                                              | 59      | 64        | 64        | 55                      | 85      | 95         | 100        |
| 11      | 60                                              | 66      | 66        | <u>66</u> | 65                      | 100     | 100        | <u>100</u> |
| 12      | 0                                               | 3       | 30        | 45        | 45                      | 30      | 75         | 90         |
| 13      | 0                                               | 60      | 66        | <u>66</u> | 0                       | 70      | 95         | <u>95</u>  |
| 14      | 2                                               | 33      | N.A.      | N.A.      | 30                      | 40      | N.A.       | N.A.       |
| 15      | 0                                               | 4       | 4         | <u>4</u>  | 0                       | 50      | 60         | <u>60</u>  |
| 16      | 64                                              | 66      | <u>66</u> | <u>66</u> | 80                      | 100     | <u>100</u> | <u>100</u> |

207

## 208 Results

### 209 Patient demographics

210 MRI and motor assessment were performed on 12, 16, 13 and 9 patients at within 1 week, 1, 3  
211 and 6 months after first-time acute ischemic stroke, respectively, as shown in Table 1. Linear  
212 mixed model was used to test the fixed effect of time on motor function (UE-FM and BI) in  
213 the process of stroke recovery. UE-FM ( $\beta_{time} = 3.47$ ;  $\chi_1^2 = 13.68$ ,  $p < 0.001$ ; **Figure 1 A**)  
214 and BI ( $\beta_{time} = 7.94$ ,  $\chi_1^2 = 28.31$ ,  $p < 0.001$ ; **Figure 1 A**) significantly increased with time.  
215 Post hoc tests showed UE-FM at 1 ( $p = 0.01$ ), 3 ( $p < 0.001$ ) and 6 ( $p < 0.001$ ) months after  
216 stroke were significantly higher than within 1 week after stroke. BI at 1, 3 and 6 ( $p < 0.001$ ,  
217 all) months after stroke were significantly higher than within 1 week, and those at 3 and 6 ( $p <$   
218  $0.001$ , all) months were significantly higher than 1 month.

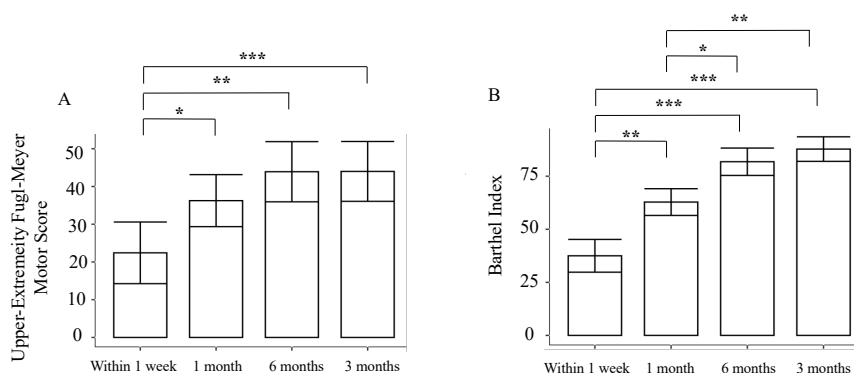

219 **Figure 1.** Box plot with error bar (standard deviance) of the upper-extremity Fugl-Meyer  
220 motor score (A) and Barthel index (B) within 1 week ( $n = 12$ ), 1 ( $n = 16$ ), 3 ( $n = 13$ ) and 6 ( $n$   
221  $= 9$ ) months after first-time acute stroke. Post hoc tests with Bonferroni corrections for multiple  
222 comparisons of different time points were performed (\* $p < 0.05$ , \*\* $p < 0.01$ , \*\*\* $p < 0.001$ )  
223

### 224 Development of rich club organization

225 The present research tracked the rich club organizational development of structural network of  
226 brain at 4 time points after stroke: within 1 week (**Figure 2 A**), 1 (**Figure 2 B**), 3 (**Figure 2 C**)  
227 and 6 months (**Figure 2 D**). Obvious rich-club organization was found from the structural brain  
228 network at different time points. Not each individual had normalized rich-club coefficient that  
229 was more than 1 in a wide range of degree except that at 6 months. For each time point, a list  
230 was obtained by averaging individual rich club nodes scores ranked in descending order by  
231 degree. The top 8 (10%) nodes of the list were selected to represent rich club regions at 4 time  
232 points and the other regions were identified as peripheral regions, which could ensure rich club  
233 organization established by equal numbers of nodes. The rich club regions at within 1 week



234 included: Frontal\_Sup\_2\_L, Frontal\_Sup\_2\_R, Supp\_Motor\_Area\_L, Supp\_Motor\_Area\_R,  
235 Insula\_R, Cingulate\_Ant\_R, Cingulate\_Mid\_L, Cingulate\_Mid\_R. At 1 month after stroke,  
236 Cingulate\_Ant\_L appeared in rich club regions and Supp\_Motor\_Area\_L disappeared. At 3  
237 months after stroke, Cingulate\_Ant\_L disappeared in rich club regions and Putamen\_R  
238 appeared. Putamen\_R disappeared and Insula\_L first appeared in rich club regions at 6 months  
239 after stroke when subjects were functionally recovered.

240 Degree of  $0 < k < 34$  was reported in this research according to the highest degree  $k$  more than  
241 80% subjects had at all time points. For each degree of  $k$ , linear mixed model was used to test  
242 the effect of time on normalized rich club coefficient. Normalized rich club coefficient was  
243 affected by time when degree was in the range  $28 < k < 33$  ( $p < 0.05$ , the logic of the likelihood  
244 ratio test). Time showed significant effect on normalized rich club coefficient when  $k$  is equal  
245 to 20 ( $\chi_1^2 = 7.22$ ,  $p = 0.007$ ,  $\beta_{time} = 0.010$ ), 21 ( $\chi_1^2 = 6.87$ ,  $p = 0.008$ ,  $\beta_{time} = 0.011$ ), 22  
246 ( $\chi_1^2 = 6.83$ ,  $p = 0.008$ ,  $\beta_{time} = 0.013$ ), and 23 ( $\chi_1^2 = 6.30$ ,  $p = 0.012$ ,  $\beta_{time} = 0.014$ ).

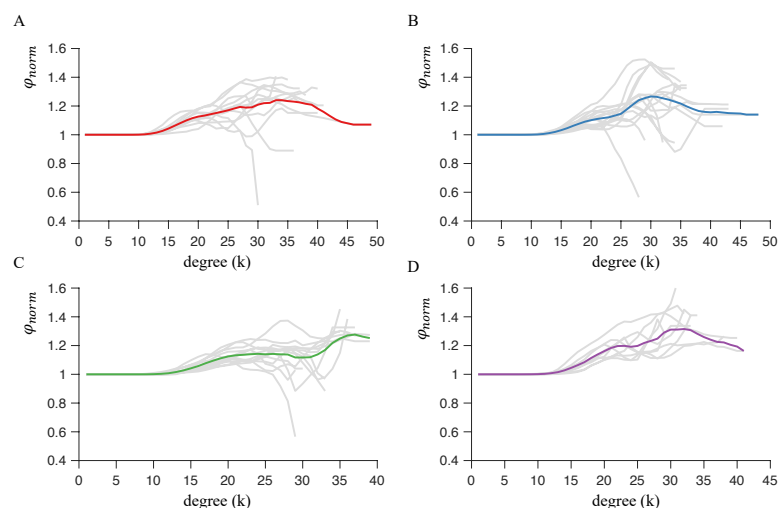

247

248 **Figure 2.** Mean normalized rich club coefficient curves (coloured lines) for the structural brain  
249 network at (A) within 1 week, (B) 1, (C) 3 and (D) 6 months after first-time acute stroke.  
250 Individual normalized rich-club curves are also shown in grey. Each individual and mean  
251 normalized rich club coefficients were larger than 1 in a range of  $k$ , suggesting rich club  
252 organization existed in all networks.

## 254 Development of network topological metrics

255 To explore the detail development of brain network, topological metrics were examined in  
256 regional scale, rich club scale, and large scale respectively. Regional scale means metric related  
257 to each node. Rich club scale means mean nodal metrics of rich club and periphery nodes, or

258 mean link metrics of rich, feeder and local connections. Large scale means the mean metrics  
259 of nodes of the whole brain network. Topological metrics in three scales were calculated  
260 including nodal degree, nodal strength, clustering coefficient, local efficiency, and  
261 betweenness centrality through the method referred in Materials and Methods. For each node,  
262 linear mixed model was used to test fixed effect of time on nodal scale metrics with age and  
263 gender as covariates, subject as random variable. 11 regions of nodal degree changed with time  
264 including Frontal\_Sup\_2\_R, Frontal\_Inf\_Oper\_L, Frontal\_Sup\_Medial\_R, OFCmed\_L,  
265 OFCmed\_R, OFCant\_L, OFClat\_L, Parietal\_Sup\_L, SupraMarginal\_L, Pallidum\_R and  
266 Heschl\_R (**Figure 3 A**). 14 regions of nodal strength changed with time including  
267 Rolandic\_Oper\_R, Frontal\_Med\_Orb\_R, OFCmed\_L, OFCmed\_R, OFCant\_L, OFCant\_R,  
268 Insula\_L, ParaHippocampal\_L, Amygdala\_R, Calcarine\_R, Cuneus\_R, Lingual\_L, Lingual\_R,  
269 Heschl\_L (**Figure 3 B**). 3 regions of local clustering coefficient changed with time including  
270 Frontal\_Sup\_2\_R, Supp\_Motor\_Area\_L, Supp\_Motor\_Area\_R and Frontal\_Sup\_Medial\_R  
271 (**Figure 3 C**) 11 regions of local efficiency changed with time including Frontal\_Inf\_Oper\_R ,  
272 OFCant\_L, OFCant\_R, Insula\_L, Hippocampus\_L, ParaHippocampal\_L, Lingual\_L,  
273 Lingual\_R, Caudate\_L, Thalamus, Temporal\_Sup\_R (**Figure 3 D**). 6 regions of nodal  
274 betweenness centrality changed with time including Frontal\_Sup\_Medial\_R ,  
275 OFClat, Cingulate\_Post\_L, Lingual\_R, Occipital\_Mid\_L, Postcentral\_R (**Figure 3 E**).

276 Linear mixed model was used to test fixed effect of time on large scale and rich club scale  
277 metrics with gender and age as covariates and subject as random variable. Eight metrics  
278 changes were shown in Table 2. Time showed significant negative effect on mean degree  
279 ( $\beta_{time} = -0.151, p = 0.008$ ), mean degree of peripheral nodes ( $\beta_{time} = 0.145, p = 0.007$ ),  
280 mean strength of peripheral nodes ( $\beta_{time} = -0.119, p = 0.049$ ), mean density of local  
281 connections ( $\beta_{time} = -8.934$ ) and density ratio of local connections ( $\beta_{time} = -0.005, p =$   
282  $0.029$ ). While time showed positive effect on density ratio of feeder connections ( $\beta_{time} =$   
283  $0.006, p = 0.008$ ), Communication cost ratio of rich connections ( $\beta_{time} = 0.005, p = 0.020$ )  
284 and communication cost ratio/density ratio of rich connections ( $\beta_{time} = 0.141, p = 0.023$ ).

285

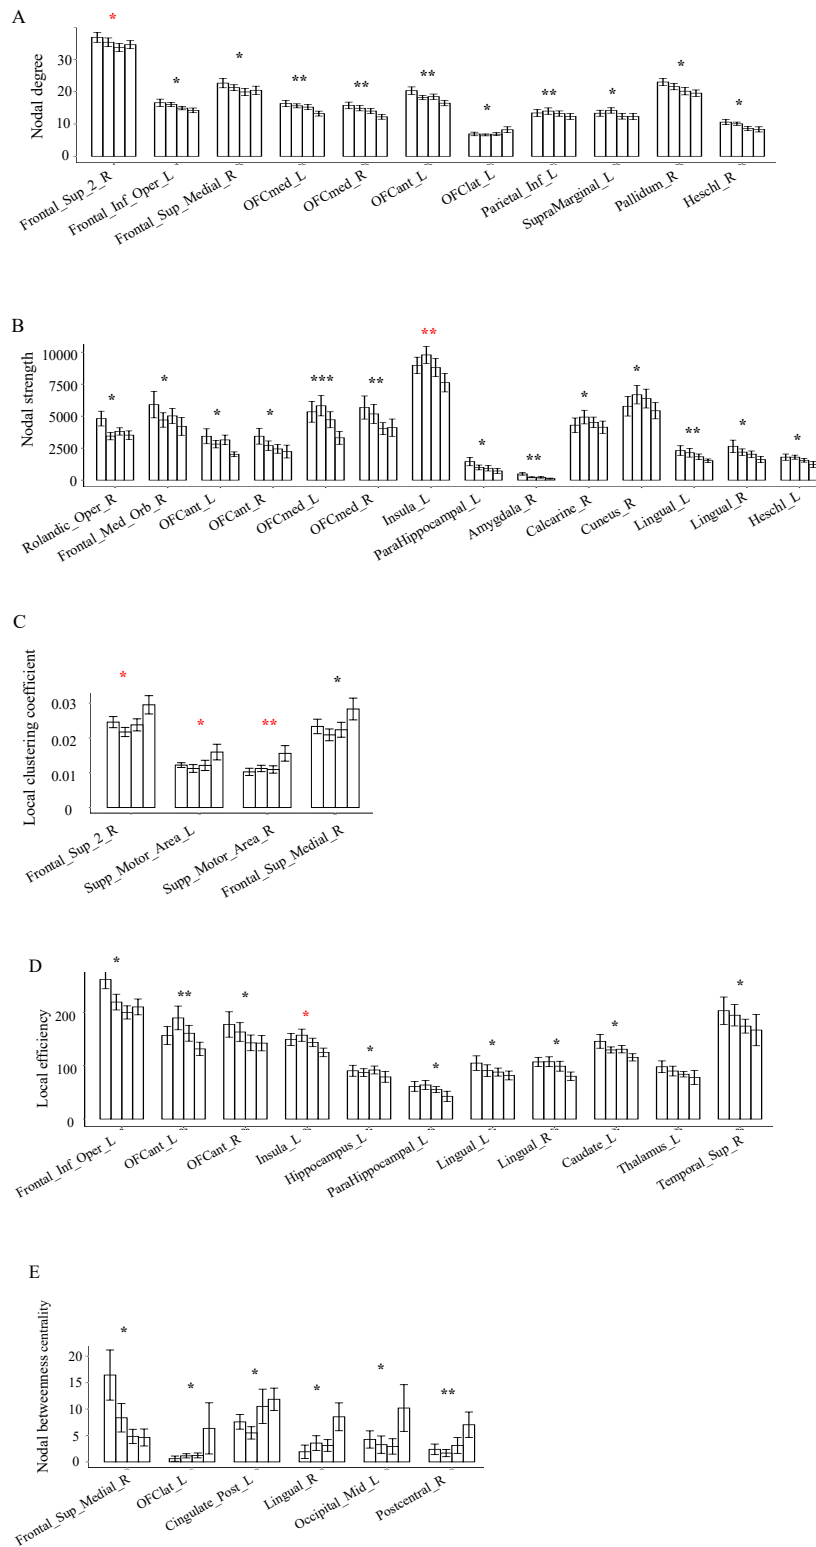

286

287

288 **Figure 3.** Regional brain network measures changes in the process of stroke recovery. A. Nodal  
 289 degree B. Nodal Strength C. Local clustering coefficient D. Local efficiency E. Nodal  
 290 betweenness centrality. Only regions with significance were displayed. \* $p < 0.05$ ,  
 291 \*\* $p < 0.01$ , \*\*\* $p < 0.001$ . Red \* represent rich club regions.

292 **Table 2** Developmental time-related curves for different brain network metrics on large scale  
 293 and rich club scale metrics. Only metrics with significance are shown.

| Metric        | $\beta_0(\text{intercept})$ | $\beta_1(\text{time})$ | Chisq | Chi Df | Pr(>Chisq) |
|---------------|-----------------------------|------------------------|-------|--------|------------|
| DEG           | 20.641                      | -0.151                 | 7.03  | 1      | 0.008      |
| DEG_P         | 19.479                      | -0.145                 | 7.30  | 1      | 0.007      |
| STR_P         | 4.539                       | -0.119                 | 3.86  | 1      | 0.049      |
| DEN_L         | 281.802                     | -8.934                 | 4.57  | 1      | 0.033      |
| DEN_RF        | 0.293                       | 0.006                  | 7.06  | 1      | 0.008      |
| DEN_RL        | 0.658                       | -0.005                 | 4.74  | 1      | 0.029      |
| COC_RR        | 0.021                       | 0.005                  | 5.43  | 1      | 0.020      |
| COC_RR/DEN_RR | 0.134                       | 0.141                  | 5.15  | 1      | 0.023      |

295  $\beta_0, \beta_1$  are the fixed effects coefficients:  $\beta_0$  is the intercept,  $\beta_1$  the linear slope; Chisq: Chi-square; Chi Df: Degree  
 296 freedom of Chi-square; DEG\_P: Mean degree of peripheral nodes; DTR\_P: Mean strength of peripheral nodes;  
 297 DEN\_L: Mean density of local connections; DEN\_RF: Density ratio of feeder connections; DEN\_RL: Density  
 298 ratio of local connections; COC\_RR: Communication cost ratio of rich connections; COC\_RR/DEN\_RR:  
 299 Communication cost ratio/density ratio of rich connections.

### 300 **Correlations between motor behaviour and topological metrics and rich club metrics**

301 Results of correlations between motor behaviour and topological metrics and rich club metrics  
 302 were showed in Table 3. Communication cost ratio of local connection ( $\beta = -72.81, p =$   
 303  $0.018; \beta = -133.30, p = 0.005$ ; respectively), communication cost ratio/density ratio of  
 304 local connections ( $\beta = -41.21, p = 0.031; \beta = -64.11, p = 0.037$ ; respectively) were  
 305 found to correlated with both UE-FM and BI in the process of stroke recovery. In addition,  
 306 mean clustering coefficient of peripheral nodes ( $\beta = -1326.693, p = 0.047$ ), mean length of  
 307 feeder and local connections ( $\beta = -0.354, p = 0.034; \beta = -0.197, p = 0.016$ ,  
 308 respectively) were found to be negative related with BI. Mean degree ( $\beta_{time} = 0.006, p =$   
 309  $0.008$ ) and mean degree of peripheral nodes ( $\beta_{time} = 0.006, p = 0.008$ ) were found to be  
 310 negative with UE-FM.

311 **Table 3** Results of correlations between motor behaviour and topological metrics and rich club  
 312 metrics

| Results | Variable     | $\beta_0(\text{intercept})$ | $\beta_1(\text{metric})$ | Chisq | Chi Df | Pr(>Chisq) |
|---------|--------------|-----------------------------|--------------------------|-------|--------|------------|
|         | DEG          | 215.372                     | -6.583                   | 5.772 | 1      | 0.016      |
|         | DEG_P        | 211.191                     | -6.761                   | 5.333 | 1      | 0.021      |
| UE-FM   | CC_RL        | 89.085                      | -72.811                  | 5.617 | 1      | 0.018      |
|         | CC_RL/DEN_RL | 87.838                      | -41.209                  | 4.657 | 1      | 0.031      |

|           |                   |         |           |       |   |       |
|-----------|-------------------|---------|-----------|-------|---|-------|
| <b>BI</b> | <b>CLU_P</b>      | 198.711 | -1326.693 | 3.947 | 1 | 0.047 |
|           | <b>LEN_F</b>      | 180.504 | -0.354    | 4.478 | 1 | 0.034 |
|           | <b>LEN_L</b>      | 177.095 | -0.197    | 5.838 | 1 | 0.016 |
|           | <b>CC_RL</b>      | 174.652 | -133.299  | 7.856 | 1 | 0.005 |
|           | <b>CC_RL/DEN_</b> |         |           |       |   |       |
|           | <b>RL</b>         | 170.42  | -64.106   | 4.344 | 1 | 0.037 |

313  $\beta_0, \beta_1$  are the fixed effects coefficients:  $\beta_0$  is the intercept,  $\beta_1$  the linear slope; Chisq: Chi-square; Chi Df: Degree  
 314 freedom of Chi-square; DEG : Mean degree; DEG\_P: Mean degree of peripheral nodes; CLU\_P: Mean clustering  
 315 coefficient of peripheral nodes; LEN\_f: Mean length of feeder connections; LEN\_L: Mean length of local  
 316 connections; CC\_RR:Communication cost ratio of rich connections; CC\_RR/DEN\_RR: Communication cost  
 317 ratio/density ratio of rich connections.

320

### 322 **Motor behaviour prediction**

323 Linear mixed models were used to explore communication metrics of brain network on the  
 324 change of motor outcome(UE-FM and BI). Data of all points were used in the models. First,  
 325 the factors correlated to change of motor outcome (subtract the baseline motor outcome from  
 326 motor outcome at other time points) were selected by comparing the model with the metric and  
 327 without the metric with each subject as random variable, metric to be tested as fixed variable,  
 328 and time, age and gender as covariates. Communication cost of rich club ( $\beta = -0.007, p =$   
 329  $0.031$ ) and normalized rich club coefficient were found to correlate with the change of UE-  
 330 FM. Density of local connections( $\beta = -0.173, p = 0.019$ ), cost ratio of feeder and local  
 331 connections( $\beta = 188.912, p = 0.016$ ;  $\beta = -145.202, p = 0.025$ ), communication cost ratio  
 332 of feeder and local connections( $\beta = 492.186, p = 0.01$ ;  $\beta = -337.023, p = 0.018$ ) and  
 333 normalized rich club coefficients were found to correlate with the change of BI. Results were  
 334 shown in **Table 4**. Variables were selected to prediction motor function as Table 5.  
 335 Communication cost of rich connections and normalized rich club coefficient( $k=21$ ) can  
 336 predict UE-FM change. Density of local connections, cost ratio of feeder connections,  
 337 communication cost ratio of feeder connections can predict BI change.

338

339 **Table 4** Communication metrics of brain network correlated the change of motor outcome

| Motor outcome | Metric              | $\beta_0$ (intercept) | $\beta_1$ (metric) | Chisq | Chi Df | Pr(>Chisq) |
|---------------|---------------------|-----------------------|--------------------|-------|--------|------------|
| <b>UE-FM</b>  | <b>COC_R</b>        | -86.411               | -0.007             | 4.634 | 1      | 0.031      |
|               | $\phi_{norm}(k=20)$ | -286.141              | 159.564            | 4.497 | 1      | 0.034      |

|           |                     |          |          |        |   |       |
|-----------|---------------------|----------|----------|--------|---|-------|
|           | $\phi_{norm}(k=21)$ | -349.076 | 210.436  | 7.858  | 1 | 0.005 |
|           | $\phi_{norm}(k=22)$ | -272.152 | 149.048  | 5.486  | 1 | 0.019 |
|           | <b>DEN_L</b>        | -69.432  | -0.173   | 5.462  | 1 | 0.019 |
|           | <b>CST_RF</b>       | -150.939 | 188.912  | 5.753  | 1 | 0.016 |
|           | <b>CST_RL</b>       | 10.797   | -145.202 | 4.996  | 1 | 0.025 |
|           | <b>COC_RF</b>       | -324.525 | 492.186  | 6.603  | 1 | 0.01  |
|           | <b>COC_RL</b>       | 70.354   | -337.023 | 5.594  | 1 | 0.018 |
| <b>BI</b> | $\phi_{norm}(k=17)$ | -421.592 | 311.835  | 6.086  | 1 | 0.014 |
|           | $\phi_{norm}(k=18)$ | -530.872 | 393.022  | 10.297 | 1 | 0.001 |
|           | $\phi_{norm}(k=19)$ | -603.204 | 440.489  | 18.797 | 1 | 0     |
|           | $\phi_{norm}(k=20)$ | -484.715 | 346.002  | 10.802 | 1 | 0.001 |
|           | $\phi_{norm}(k=21)$ | -348.872 | 235.464  | 4.128  | 1 | 0.042 |
|           | $\phi_{norm}(k=22)$ | -322.003 | 215.283  | 4.999  | 1 | 0.025 |
|           | $\phi_{norm}(k=27)$ | -185.867 | 86.454   | 4.021  | 1 | 0.045 |

340  $\beta_0, \beta_1$  are the fixed effects coefficients:  $\beta_0$  is the intercept,  $\beta_1$  the linear slope; Chisq: Chi-square; Chi Df: Degree  
 341 freedom of Chi-square; COC\_R: Communication cost of rich club; DEN\_L: Density of local connections;  
 342 CST\_RF: Cost ratio of feeder connections; CST\_RL: Cost ratio of local connections; COC\_RF:Communication  
 343 cost ratio of feeder connections; COC\_RL:Communication cost ratio of local connections.

345 **Table 5** Summary of prediction models explored. Subtract of the follow-up outcome and  
 346 initial outcome was defined as responses. Independent variables considered in the model  
 347 were connected by '+’.

| Response                         | Model             | Variable                                                                                              | AIC    | BIC    | Chisq  | Chi DF | Pr(>Chisq) |
|----------------------------------|-------------------|-------------------------------------------------------------------------------------------------------|--------|--------|--------|--------|------------|
| <b>UE-FM –<br/>Initial UE-FM</b> | <b>Baseline</b>   | <b>Age + gender +<br/>time</b>                                                                        | 301    | 309.98 |        |        |            |
|                                  | <b>Prediction</b> | <b>Age + gender +<br/>time + COC_R +<br/><math>\phi_{norm}(k=21)</math></b>                           | 294.26 | 306.23 | 10.746 | 2      | 0.005      |
| <b>BI - Initial BI</b>           | <b>Baseline</b>   | <b>Age+ gender+<br/>time</b>                                                                          | 308.39 | 317.37 |        |        |            |
|                                  | <b>Prediction</b> | <b>Age + gender +<br/>time + DEN_L +<br/>CST_RF +<br/>COC_RF + <math>\phi_{norm}</math><br/>(k19)</b> | 297.62 | 314.08 | 20.775 | 5      | <0.001     |

348 AIC: Akaike information criterion; BIC: Bayesian information criterion; logLik: log-likelihood Chisq: Chi-square;  
349 Chi Df: Degree freedom of Chi-square; COC\_R: Communication cost of rich club; CST\_RF: Cost ratio of feeder  
350 connections; COC\_RF: Communication cost ratio of feeder connections

351

## 352 **Discussion**

353 The results show that rich club metrics can be prognostic indicator for motor recovery (UE-  
354 FM and BI) after acute ischemic stroke that did not found by studies previously. Our findings  
355 concerned the rich club regions, normalized rich club coefficient changes, and communication  
356 of the different connections to model and predict the motor outcome and it extend the work by  
357 Ktena<sup>30</sup> and Schirmer<sup>29</sup>. Ktena use the character path length and mean of NRC(the number of  
358 rich club regions influenced) to predict stroke recovery measured by National Institutes of  
359 Health Stroke Scale (NIHSS) and modified Rankin Scale (mRS) of 41 patients.<sup>30</sup> Schirmer  
360 investigated the association between the  $N_{RC}$  and stroke severity (NIHSS) and functional stroke  
361 outcome (mRS) of 344 patients. <sup>29</sup> They both showed the number of  $N_{RC}$  can be a potential  
362 predictor for prediction of stroke recovery. Our findings about the association between rich  
363 club metric and motor recovery suggest that larger scale metrics of connectivity is meaningful  
364 to predict motor recovery of stroke patients. Our studied first analysis the motor outcome based  
365 on rich club organization deeply and we calculated rich club organization by patients network,  
366 which can reflect rich club dynamics, however others identified those regions that are part of  
367 the rich-club as described by van den Heuvel and Sporns<sup>52</sup>, which is another perspective in fact.

368 Motor recovery were found to increase with time, however, post-hoc test showed the motor at  
369 3 month and 6 month after stroke were not significantly different, which confirmed a critical  
370 period of approximately 90 days of increased synaptic plasticity activated after stroke and at  
371 peak at 3 month after stroke<sup>48,49</sup>. It is normal that rich club organization changed in the process  
372 of stroke recovery because it is the backbone of brain communication<sup>24,46,47</sup> and as the patient  
373 recovered, brain structure changed because of plasticity including activity-dependent rewiring  
374 and synapse strengthening<sup>48</sup>. Among 4 time points, 75% rich club regions were stable including  
375 left and right dorsolateral superior frontal gyrus (No.3 and 4), right supplementary motor area  
376 (No.16), right insula (No.34), right anterior cingulate gyrus (No.36), left and right median  
377 cingulate gyrus (No.37 and 38). Regions changed including left supplementary motor area  
378 (No.15), left anterior cingulate gyrus(No.35), right putamen (No.78) and especially left insula

379 (No.33), which appeared at the last time point when patients functionally recovered. Among  
380 these 4 regions, three of them were left, which suggest that for rich club regions of the  
381 hemisphere of stroke region changed more than the other side. We found time showed  
382 significant effect on rich club coefficient when  $k$  was in the range of 20 to 23, which suggested  
383 rich club coefficient may have correlation with behaviour and it has been observed in  
384 Alzheimers' disease.<sup>28</sup>

385 Nodal analysis was performed in order to track the change of each region in detail and to see  
386 whether the rich club regions are infected. No rich club region were found to change in degree  
387 and betweenness centrality and only left insula in rich club regions were changed in strength  
388 and it is very different with Huntington's Disease<sup>50</sup>, in which degree of rich club regions  
389 changed much. Three regions changed in clustering coefficient were all rich club regions  
390 including right dorsolateral superior frontal gyrus left and right supplementary motor area. It  
391 seems that clustering coefficient play an important role in function recovery.

392 Among four metric correlated with UE-FM and five metric correlated with BI, higher  
393 communication cost ratio and higher capacity of local connections were found to correlate with  
394 lower UE-FM and BI. Though other metrics were also found correlated with UE-FM including  
395 degree, degree of peripheral nodes, correlated with BI including clustering coefficient of  
396 peripheral nodes, length of feeder and local connections, the same metrics may release the inner  
397 basis of motor function essentially. Communication cost of rich connections and normalized  
398 rich club coefficient( $k=21$ ) can predict UE-FM change. Density of local connections, cost ratio  
399 of feeder connections, communication cost ratio of feeder connections can predict BI change.

400 Several limitations still need to be taken into consideration when interpreting the results. First,  
401 infract side of stroke lesion were different among the 16 patients. Stroke lesions of 8 patients  
402 were in left side and others were in right side. In order to avoid systematic error, we flipped all  
403 the brain regions of the patients whose stroke lesion infract side was right to left to ensure  
404 lesions in the same side, namely left side. However, it may influence the results slightly because  
405 the left and right hemisphere are not totally same, for example, the strength of left and right are  
406 not completely equal<sup>52</sup>. Second, Missing values existed in our dataset. In the longitude dataset  
407 collection, sometimes patients cannot come to perform MRI experiment because of their own  
408 individual regions. Only all patients attended to the MRI experiment at 1 month after stroke,  
409 and 4, 3, 7 patients unattended at within 1 week, 3 and 6 months after acute stroke respectively,  
410 which could reduce the quantity of the result. Third, when analysing the dataset, we found



411 sometimes there existed nonlinear trend of the data with time went by, which could be explored  
412 in our future study.  
413

414 **References**

- 415 (1) Langhorne, P.; Coupar, F.; Pollock, A. Motor Recovery after Stroke: A Systematic  
416 Review. *The Lancet Neurology* **2009**, *8* (8), 741–754.
- 417 (2) Warlow, C. P.; Van Gijn, J.; Dennis, M. S.; Wardlaw, J. M.; Bamford, J. M.; Hankey, G.  
418 J.; Sandercock, P. A.; Rinkel, G.; Langhorne, P.; Sudlow, C. *Stroke: Practical*  
419 *Management*; John Wiley & Sons, 2011.
- 420 (3) Johansson, B. B. Brain Plasticity and Stroke Rehabilitation: The Willis Lecture. *Stroke*  
421 **2000**, *31* (1), 223–230.
- 422 (4) Murphy, T. H.; Corbett, D. Plasticity during Stroke Recovery: From Synapse to  
423 Behaviour. *Nature Reviews Neuroscience* **2009**, *10* (12), 861–872.
- 424 (5) Schaechter, J. D. Motor Rehabilitation and Brain Plasticity after Hemiparetic Stroke.  
425 *Progress in neurobiology* **2004**, *73* (1), 61–72.
- 426 (6) Di Pino, G.; Pellegrino, G.; Assenza, G.; Capone, F.; Ferreri, F.; Formica, D.; Ranieri, F.;  
427 Tombini, M.; Ziemann, U.; Rothwell, J. C. Modulation of Brain Plasticity in Stroke: A  
428 Novel Model for Neurorehabilitation. *Nature Reviews Neurology* **2014**, *10* (10), 597–  
429 608.
- 430 (7) Ward, N. S.; Newton, J. M.; Swayne, O. B.; Lee, L.; Thompson, A. J.; Greenwood, R. J.;  
431 Rothwell, J. C.; Frackowiak, R. S. Motor System Activation after Subcortical Stroke  
432 Depends on Corticospinal System Integrity. *Brain* **2006**, *129* (3), 809–819.
- 433 (8) Kirton, A.; Shroff, M.; Visvanathan, T.; Deveber, G. Quantified Corticospinal Tract  
434 Diffusion Restriction Predicts Neonatal Stroke Outcome. *Stroke* **2007**, *38* (3), 974–  
435 980.
- 436 (9) Stinear, C. M.; Barber, P. A.; Smale, P. R.; Coxon, J. P.; Fleming, M. K.; Byblow, W. D.  
437 Functional Potential in Chronic Stroke Patients Depends on Corticospinal Tract  
438 Integrity. *Brain* **2007**, *130* (1), 170–180.
- 439 (10) Zhu, L. L.; Lindenberg, R.; Alexander, M. P.; Schlaug, G. Lesion Load of the  
440 Corticospinal Tract Predicts Motor Impairment in Chronic Stroke. *Stroke* **2010**, *41* (5),  
441 910–915.
- 442 (11) Newton, J. M.; Ward, N. S.; Parker, G. J.; Deichmann, R.; Alexander, D. C.; Friston, K.  
443 J.; Frackowiak, R. S. Non-Invasive Mapping of Corticofugal Fibres from Multiple  
444 Motor Areas—Relevance to Stroke Recovery. *Brain* **2006**, *129* (7), 1844–1858.
- 445 (12) Lindberg, P. G.; Skejød, P. H.; Rounis, E.; Nagy, Z.; Schmitz, C.; Wernegren, H.; Bring,  
446 A.; Engardt, M.; Forssberg, H.; Borg, J. Wallerian Degeneration of the Corticofugal  
447 Tracts in Chronic Stroke: A Pilot Study Relating Diffusion Tensor Imaging,

- 448 Transcranial Magnetic Stimulation, and Hand Function. *Neurorehabilitation and*  
449 *neural repair* **2007**, *21* (6), 551–560.
- 450 (13) Strens, L. H. A.; Asselman, P.; Pogosyan, A.; Loukas, C.; Thompson, A. J.; Brown, P.  
451 Corticocortical Coupling in Chronic Stroke: Its Relevance to Recovery. *Neurology*  
452 **2004**, *63* (3), 475–484.
- 453 (14) Feydy, A.; Carlier, R.; Roby-Brami, A.; Bussel, B.; Cazalis, F.; Pierot, L.; Burnod, Y.;  
454 Maier, M. A. Longitudinal Study of Motor Recovery after Stroke: Recruitment and  
455 Focusing of Brain Activation. *Stroke* **2002**, *33* (6), 1610–1617.
- 456 (15) Schulz, R.; Braass, H.; Liuzzi, G.; Hoerniss, V.; Lechner, P.; Gerloff, C.; Hummel, F. C.  
457 White Matter Integrity of Premotor–Motor Connections Is Associated with Motor  
458 Output in Chronic Stroke Patients. *NeuroImage: Clinical* **2015**, *7*, 82–86.
- 459 (16) Rubinov, M.; Sporns, O. Complex Network Measures of Brain Connectivity: Uses and  
460 Interpretations. *Neuroimage* **2010**, *52* (3), 1059–1069.
- 461 (17) Fornito, A.; Zalesky, A.; Bullmore, E. *Fundamentals of Brain Network Analysis*;  
462 Academic Press, 2016.
- 463 (18) Crofts, J. J.; Higham, D. J.; Bosnell, R.; Jbabdi, S.; Matthews, P. M.; Behrens, T. E. J.;  
464 Johansen-Berg, H. Network Analysis Detects Changes in the Contralateral  
465 Hemisphere Following Stroke. *Neuroimage* **2011**, *54* (1), 161–169.
- 466 (19) Colizza, V.; Flammini, A.; Serrano, M. A.; Vespignani, A. Detecting Rich-Club  
467 Ordering in Complex Networks. *Nature physics* **2006**, *2* (2), 110.
- 468 (20) McAuley, J. J.; da Fontoura Costa, L.; Caetano, T. S. Rich-Club Phenomenon across  
469 Complex Network Hierarchies. *Applied Physics Letters* **2007**, *91* (8), 084103.
- 470 (21) Grayson, D. S.; Ray, S.; Carpenter, S.; Iyer, S.; Dias, T. G. C.; Stevens, C.; Nigg, J. T.;  
471 Fair, D. A. Structural and Functional Rich Club Organization of the Brain in Children  
472 and Adults. *PloS one* **2014**, *9* (2).
- 473 (22) Ball, G.; Aljabar, P.; Zebari, S.; Tusor, N.; Arichi, T.; Merchant, N.; Robinson, E. C.;  
474 Ogundipe, E.; Rueckert, D.; Edwards, A. D. Rich-Club Organization of the Newborn  
475 Human Brain. *Proceedings of the National Academy of Sciences* **2014**, *111* (20), 7456–  
476 7461.
- 477 (23) Van Den Heuvel, M. P.; Sporns, O. Rich-Club Organization of the Human Connectome.  
478 *Journal of Neuroscience* **2011**, *31* (44), 15775–15786.
- 479 (24) van den Heuvel, M. P.; Kahn, R. S.; Goñi, J.; Sporns, O. High-Cost, High-Capacity  
480 Backbone for Global Brain Communication. *Proceedings of the National Academy of*  
481 *Sciences* **2012**, *109* (28), 11372–11377.

- 482 (25) Senden, M.; Deco, G.; de Reus, M. A.; Goebel, R.; van den Heuvel, M. P. Rich Club  
483 Organization Supports a Diverse Set of Functional Network Configurations.  
484 *Neuroimage* **2014**, *96*, 174–182.
- 485 (26) van den Heuvel, M. P.; Sporns, O.; Collin, G.; Scheewe, T.; Mandl, R. C.; Cahn, W.;  
486 Goñi, J.; Pol, H. E. H.; Kahn, R. S. Abnormal Rich Club Organization and Functional  
487 Brain Dynamics in Schizophrenia. *JAMA psychiatry* **2013**, *70* (8), 783–792.
- 488 (27) McColgan, P.; Seunarine, K. K.; Razi, A.; Cole, J. H.; Gregory, S.; Durr, A.; Roos, R.  
489 A.; Stout, J. C.; Landwehrmeyer, B.; Scahill, R. I. Selective Vulnerability of Rich Club  
490 Brain Regions Is an Organizational Principle of Structural Connectivity Loss in  
491 Huntington’s Disease. *Brain* **2015**, *138* (11), 3327–3344.
- 492 (28) Yan, T.; Wang, W.; Yang, L.; Chen, K.; Chen, R.; Han, Y. Rich Club Disturbances of  
493 the Human Connectome from Subjective Cognitive Decline to Alzheimer’s Disease.  
494 *Theranostics* **2018**, *8* (12), 3237.
- 495 (29) Schirmer, M. D.; Ktena, S. I.; Nardin, M. J.; Donahue, K. L.; Giese, A.-K.; Etherton,  
496 M.; Wu, O.; Rost, N. Rich-Club Organization: An Important Determinant of  
497 Functional Outcome after Acute Ischemic Stroke. *Frontiers in neurology* **2019**, *10*,  
498 956.
- 499 (30) Ktena, S. I.; Schirmer, M. D.; Etherton, M. R.; Giese, A.-K.; Tuozzo, C.; Mills, B. B.;  
500 Rueckert, D.; Wu, O.; Rost, N. S. Brain Connectivity Measures Improve Modeling of  
501 Functional Outcome after Acute Ischemic Stroke. *Stroke* **2019**, *50* (10), 2761–2767.
- 502 (31) Sullivan, K. J.; Tilson, J. K.; Cen, S. Y.; Rose, D. K.; Hershberg, J.; Correa, A.;  
503 Gallichio, J.; McLeod, M.; Moore, C.; Wu, S. S. Fugl-Meyer Assessment of  
504 Sensorimotor Function after Stroke: Standardized Training Procedure for Clinical  
505 Practice and Clinical Trials. *Stroke* **2011**, *42* (2), 427–432.
- 506 (32) Kwakkel, G.; Veerbeek, J. M.; Harmeling-van der Wel, B. C.; van Wegen, E.; Kollen,  
507 B. J. Diagnostic Accuracy of the Barthel Index for Measuring Activities of Daily  
508 Living Outcome after Ischemic Hemispheric Stroke: Does Early Poststroke Timing of  
509 Assessment Matter? *Stroke* **2011**, *42* (2), 342–346.
- 510 (33) Andersson, J. L.; Skare, S. A Model-Based Method for Retrospective Correction of  
511 Geometric Distortions in Diffusion-Weighted EPI. *Neuroimage* **2002**, *16* (1), 177–199.
- 512 (34) Talairach, J. 3-Dimensional Proportional System; an Approach to Cerebral Imaging.  
513 Co-Planar Stereotaxic Atlas of the Human Brain. *Thieme* **1988**, 1–122.

- 514 (35) Wang, R.; Benner, T.; Sorensen, A. G.; Wedeen, V. J. Diffusion Toolkit: A Software  
515 Package for Diffusion Imaging Data Processing and Tractography. In *Proc Intl Soc*  
516 *Mag Reson Med*; Berlin, 2007; Vol. 15.
- 517 (36) Mori, S.; Crain, B. J.; Chacko, V. P.; Van Zijl, P. C. Three-Dimensional Tracking of  
518 Axonal Projections in the Brain by Magnetic Resonance Imaging. *Annals of*  
519 *Neurology: Official Journal of the American Neurological Association and the Child*  
520 *Neurology Society* **1999**, *45* (2), 265–269.
- 521 (37) Mori, S.; Van Zijl, P. C. Fiber Tracking: Principles and Strategies—a Technical Review.  
522 *NMR in Biomedicine: An International Journal Devoted to the Development and*  
523 *Application of Magnetic Resonance In Vivo* **2002**, *15* (7–8), 468–480.
- 524 (38) Rolls, E. T.; Joliot, M.; Tzourio-Mazoyer, N. Implementation of a New Parcellation of  
525 the Orbitofrontal Cortex in the Automated Anatomical Labeling Atlas. *Neuroimage*  
526 **2015**, *122*, 1–5.
- 527 (39) Opsahl, T.; Colizza, V.; Panzarasa, P.; Ramasco, J. J. Prominence and Control: The  
528 Weighted Rich-Club Effect. *Physical review letters* **2008**, *101* (16), 168702.
- 529 (40) Ball, G.; Aljabar, P.; Zebari, S.; Tusor, N.; Arichi, T.; Merchant, N.; Robinson, E. C.;  
530 Ogundipe, E.; Rueckert, D.; Edwards, A. D. Rich-Club Organization of the Newborn  
531 Human Brain. *Proceedings of the National Academy of Sciences* **2014**, *111* (20), 7456–  
532 7461.
- 533 (41) Bullmore, E.; Vértes, P. From Lichtheim to Rich Club: Brain Networks and Psychiatry.  
534 *JAMA psychiatry* **2013**, *70* (8), 780–782.
- 535 (42) van den Heuvel, M. P.; Kahn, R. S.; Goñi, J.; Sporns, O. High-Cost, High-Capacity  
536 Backbone for Global Brain Communication. *Proceedings of the National Academy of*  
537 *Sciences* **2012**, *109* (28), 11372–11377.
- 538 (43) Cnaan, A.; Laird, N. M.; Slasor, P. Using the General Linear Mixed Model to Analyse  
539 Unbalanced Repeated Measures and Longitudinal Data. *Statistics in medicine* **1997**, *16*  
540 (20), 2349–2380.
- 541 (44) Verbeke, G.; Molenberghs, G. *Linear Mixed Models for Longitudinal Data*; Springer  
542 Science & Business Media, 2009.
- 543 (45) Winter, B. Linear Models and Linear Mixed Effects Models in R with Linguistic  
544 Applications. *arXiv preprint arXiv:1308.5499* **2013**.
- 545 (46) Harriger, L.; Van Den Heuvel, M. P.; Sporns, O. Rich Club Organization of Macaque  
546 Cerebral Cortex and Its Role in Network Communication. *PloS one* **2012**, *7* (9),  
547 e46497.

- 548 (47) de Reus, M. A.; van den Heuvel, M. P. Rich Club Organization and Intermodule  
549 Communication in the Cat Connectome. *Journal of Neuroscience* **2013**, *33* (32),  
550 12929–12939.
- 551 (48) Murphy, T. H.; Corbett, D. Plasticity during Stroke Recovery: From Synapse to  
552 Behaviour. *Nature Reviews Neuroscience* **2009**, *10* (12), 861.
- 553 (49) Maulden, S. A.; Gassaway, J.; Horn, S. D.; Smout, R. J.; DeJong, G. Timing of  
554 Initiation of Rehabilitation after Stroke. *Archives of physical medicine and*  
555 *rehabilitation* **2005**, *86* (12), 34–40.
- 556 (50) McColgan, P.; Seunarine, K. K.; Razi, A.; Cole, J. H.; Gregory, S.; Durr, A.; Roos, R.  
557 A.; Stout, J. C.; Landwehrmeyer, B.; Scahill, R. I. Selective Vulnerability of Rich Club  
558 Brain Regions Is an Organizational Principle of Structural Connectivity Loss in  
559 Huntington’s Disease. *Brain* **2015**, *138* (11), 3327–3344.
- 560 (51) Schirmer, M. D.; Ktena, S. I.; Nardin, M. J.; Donahue, K. L.; Giese, A.-K.; Etherton, M.  
561 R.; Wu, O.; Rost, N. S. Rich-Club Organization: An Important Determinant of  
562 Functional Outcome after Acute Ischemic Stroke. *BioRxiv* **2019**, 545897.
- 563 (52) Van Den Heuvel, M. P.; Sporns, O. Rich-Club Organization of the Human Connectome.  
564 *Journal of Neuroscience* **2011**, *31* (44), 15775–15786.  
565  
566  
567
